# Supplementary material for: Transcriptomic Bioinformatic Analyses of Atria Uncover Involvement of Pathways Related to Strain and Post-translational Modification of Collagen in Increased Atrial Fibrillation Vulnerability in Intensely Exercised Mice
Source: Front Physiol. 2020 Dec 23;11:605671. doi: 10.3389/fphys.2020.605671 (PMC7793719; doi:10.3389/fphys.2020.605671)
Supplement: Supplementary file 5 [file Table_4.XLSX]

## Sheet: LAA_SedWT_SwimWT
Differentially regulated pathways in 2 days of swim exercise
Enriched in SedWT						Enriched in SwimWT
NAME	SIZE	NES	NOM p-val	FDR q-val		NAME	SIZE	NES	NOM p-val	FDR q-val
KEGG_DNA_REPLICATION	34	2.01464	0	0.0211163		REACTOME_SMOOTH_MUSCLE_CONTRACTION	36	-2.05426	0	0.0482563
REACTOME_DNA_STRAND_ELONGATION	31	2.01095	0	0.0112737		KEGG_PATHOGENIC_ESCHERICHIA_COLI_INFECTION	53	-2.00743	0	0.0535737
REACTOME_DNA_REPLICATION_PRE_INITIATION	84	1.94303	0	0.027625		REACTOME_RHO_GTPASES_ACTIVATE_IQGAPS	28	-1.96954	0.000465	0.0626799
REACTOME_ACTIVATION_OF_THE_PRE_REPLICATIVE_COMPLEX	32	1.93774	0.000172861	0.0228789		BIOCARTA_NUCLEARRS_PATHWAY	34	-1.96214	0.000476	0.0520845
BIOCARTA_CTLA4_PATHWAY	18	1.93347	0	0.019407		REACTOME_ASSEMBLY_AND_CELL_SURFACE_PRESENTATION_OF_NMDA_RECEPTORS	40	-1.95884	0	0.0438779
REACTOME_DNA_REPLICATION	125	1.87978	0	0.0388239		REACTOME_SEALING_OF_THE_NUCLEAR_ENVELOPE_NE_BY_ESCRT_III	26	-1.91162	0.00120019	0.0708217
REACTOME_POLYMERASE_SWITCHING_ON_THE_C_STRAND_OF_THE_TELOMERE	17	1.85497	0.000707214	0.048183		REACTOME_TRANSPORT_OF_CONNEXONS_TO_THE_PLASMA_MEMBRANE	17	-1.90291	0.00137646	0.067878
PID_DNA_PK_PATHWAY	15	1.83379	0.000362056	0.0570928		REACTOME_ACTIVATION_OF_AMPK_DOWNSTREAM_OF_NMDARS	25	-1.83985	0.0021449	0.12787
REACTOME_PCNA_DEPENDENT_LONG_PATCH_BASE_EXCISION_REPAIR	20	1.8164	0.00141743	0.0644725		REACTOME_FORMATION_OF_TUBULIN_FOLDING_INTERMEDIATES_BY_CCT_TRIC	23	-1.83773	0.00256171	0.116153
PID_ATR_PATHWAY	39	1.7986	0.00137221	0.0739831		REACTOME_RHO_GTPASES_ACTIVATE_PAKS	20	-1.8369	0.00257009	0.105518
KEGG_INTESTINAL_IMMUNE_NETWORK_FOR_IGA_PRODUCTION	40	1.79718	0.00051116	0.0686709		REACTOME_POST_CHAPERONIN_TUBULIN_FOLDING_PATHWAY	21	-1.83304	0.00161588	0.100248
REACTOME_CELLULAR_HEXOSE_TRANSPORT	19	1.79153	0.00265769	0.0678433		REACTOME_NUCLEOTIDE_LIKE_PURINERGIC_RECEPTORS	15	-1.81471	0.00335271	0.113417
REACTOME_ASSEMBLY_OF_THE_PRE_REPLICATIVE_COMPLEX	68	1.78007	0.000330961	0.0727444		REACTOME_COOPERATION_OF_PREFOLDIN_AND_TRIC_CCT_IN_ACTIN_AND_TUBULIN_FOLDING	30	-1.80577	0.00375146	0.115694
KEGG_ASTHMA	23	1.7775	0.00177778	0.0698748		KEGG_HYPERTROPHIC_CARDIOMYOPATHY_HCM	82	-1.7993	0	0.11511
REACTOME_ACTIVATION_OF_ATR_IN_RESPONSE_TO_REPLICATION_STRESS	37	1.77252	0.000862813	0.0692968		KEGG_DILATED_CARDIOMYOPATHY	88	-1.77372	0.000261	0.140473
REACTOME_APC_C_MEDIATED_DEGRADATION_OF_CELL_CYCLE_PROTEINS	86	1.76343	0.00016218	0.072789		REACTOME_TRP_CHANNELS	28	-1.77143	0.00326645	0.134783
REACTOME_RESOLUTION_OF_AP_SITES_VIA_THE_MULTIPLE_NUCLEOTIDE_PATCH_REPLACEMENT_PATHWAY	24	1.76323	0.00227233	0.0686801		REACTOME_LAMININ_INTERACTIONS	30	-1.77093	0.00261905	0.127469
REACTOME_TERMINATION_OF_TRANSLESION_DNA_SYNTHESIS	32	1.76219	0.00137812	0.0657116		REACTOME_SIGNALING_BY_MODERATE_KINASE_ACTIVITY_BRAF_MUTANTS	44	-1.767	0.00216711	0.125679
REACTOME_PD_1_SIGNALING	15	1.75107	0.00301418	0.0713062		BIOCARTA_NOS1_PATHWAY	20	-1.7578	0.00528979	0.130508
KEGG_MISMATCH_REPAIR	21	1.72841	0.00409034	0.0895102		KEGG_REGULATION_OF_ACTIN_CYTOSKELETON	208	-1.75502	0	0.127424
REACTOME_ORC1_REMOVAL_FROM_CHROMATIN	71	1.72839	0.000494397	0.0852701		REACTOME_FGFR1_LIGAND_BINDING_AND_ACTIVATION	16	-1.75365	0.00759319	0.122957
REACTOME_SWITCHING_OF_ORIGINS_TO_A_POST_REPLICATIVE_STATE	90	1.726	0.000646204	0.0838017		PID_INTEGRIN3_PATHWAY	43	-1.73838	0.00405438	0.137379
REACTOME_TRANSLESION_SYNTHESIS_BY_Y_FAMILY_DNA_POLYMERASES_BYPASSES_LESIONS_ON_DNA_TEMPLATE	39	1.70652	0.00362069	0.101146		BIOCARTA_NDKDYNAMIN_PATHWAY	16	-1.73632	0.00941447	0.134029
REACTOME_APC_C_CDH1_MEDIATED_DEGRADATION_OF_CDC20_AND_OTHER_APC_C_CDH1_TARGETED_PROTEINS_IN_LATE_MITOSIS_EARLY_G1	72	1.69244	0.000665336	0.113657		REACTOME_MAP2K_AND_MAPK_ACTIVATION	39	-1.73286	0.0039053	0.132907
KEGG_HISTIDINE_METABOLISM	28	1.69149	0.00592954	0.11034		BIOCARTA_ARAP_PATHWAY	17	-1.72408	0.00731763	0.138986
REACTOME_AFLATOXIN_ACTIVATION_AND_DETOXIFICATION	15	1.68414	0.0100304	0.115581		REACTOME_NON_INTEGRIN_MEMBRANE_ECM_INTERACTIONS	59	-1.72131	0.00268883	0.13728
KEGG_OTHER_GLYCAN_DEGRADATION	16	1.68331	0.0103553	0.112378		REACTOME_PEPTIDE_LIGAND_BINDING_RECEPTORS	180	-1.71728	0	0.137364
KEGG_AUTOIMMUNE_THYROID_DISEASE	31	1.67465	0.00601581	0.119286		PID_INTEGRIN1_PATHWAY	66	-1.71388	0.00128899	0.13678
REACTOME_FOXO_MEDIATED_TRANSCRIPTION_OF_CELL_DEATH_GENES	16	1.66956	0.00905861	0.121506		REACTOME_CELL_EXTRACELLULAR_MATRIX_INTERACTIONS	18	-1.71377	0.00990099	0.132207
KEGG_GRAFT_VERSUS_HOST_DISEASE	26	1.66888	0.00865727	0.118381		REACTOME_DEPOLYMERISATION_OF_THE_NUCLEAR_LAMINA	15	-1.70582	0.0107602	0.13752
KEGG_TRYPTOPHAN_METABOLISM	40	1.66452	0.00598188	0.120133		REACTOME_ACTIVATION_OF_NMDA_RECEPTORS_AND_POSTSYNAPTIC_EVENTS	88	-1.69631	0.00104221	0.145507
KEGG_ALLOGRAFT_REJECTION	27	1.65477	0.00981595	0.129338		REACTOME_SIGNALING_BY_WNT_IN_CANCER	34	-1.69219	0.00755608	0.146573
KEGG_VALINE_LEUCINE_AND_ISOLEUCINE_DEGRADATION	44	1.65003	0.00506842	0.131829		REACTOME_MECP2_REGULATES_NEURONAL_RECEPTORS_AND_CHANNELS	18	-1.68501	0.0118101	0.152035
KEGG_HOMOLOGOUS_RECOMBINATION	27	1.64758	0.0107622	0.131164		REACTOME_FGFR2_LIGAND_BINDING_AND_ACTIVATION	19	-1.68499	0.0103591	0.147609
PID_BARD1_PATHWAY	28	1.63921	0.00993378	0.138831		REACTOME_NEPHRIN_FAMILY_INTERACTIONS	23	-1.67839	0.0114674	0.152136
REACTOME_DEFECTIVE_CFTR_CAUSES_CYSTIC_FIBROSIS	61	1.61477	0.00477523	0.172585		KEGG_MELANOGENESIS	99	-1.67409	0.0010474	0.153264
REACTOME_S_PHASE	160	1.61007	0.000614251	0.176081		REACTOME_NUCLEAR_ENVELOPE_NE_REASSEMBLY	70	-1.67309	0.00150338	0.150438
BIOCARTA_ATRBRCA_PATHWAY	21	1.60836	0.0156467	0.174444		REACTOME_CHEMOKINE_RECEPTORS_BIND_CHEMOKINES	49	-1.65623	0.00481464	0.170569
REACTOME_GAP_FILLING_DNA_REPAIR_SYNTHESIS_AND_LIGATION_IN_GG_NER	24	1.60551	0.015584	0.174788		BIOCARTA_ALK_PATHWAY	37	-1.65429	0.00742515	0.16911
REACTOME_MITOTIC_G1_PHASE_AND_G1_S_TRANSITION	147	1.5971	0.000312793	0.184521		REACTOME_RECYCLING_PATHWAY_OF_L1	44	-1.65422	0.00566642	0.164965
						REACTOME_STRIATED_MUSCLE_CONTRACTION	36	-1.64974	0.00676819	0.167443
						REACTOME_RESPONSE_TO_ELEVATED_PLATELET_CYTOSOLIC_CA2	131	-1.64302	0.000831	0.173259
						BIOCARTA_ERYTH_PATHWAY	15	-1.64162	0.0179931	0.171257
						REACTOME_COPI_INDEPENDENT_GOLGI_TO_ER_RETROGRADE_TRAFFIC	49	-1.64015	0.00580551	0.16944
						REACTOME_CLASS_A_1_RHODOPSIN_LIKE_RECEPTORS	307	-1.63618	0	0.171438
						PID_AVB3_INTEGRIN_PATHWAY	74	-1.63593	0.00279117	0.1681
						PID_S1P_META_PATHWAY	21	-1.62366	0.0196491	0.182446
						BIOCARTA_NO1_PATHWAY	27	-1.6236	0.0115812	0.178763
						REACTOME_CARBOXYTERMINAL_POST_TRANSLATIONAL_MODIFICATIONS_OF_TUBULIN	39	-1.62236	0.00916767	0.176947
						REACTOME_AGGREPHAGY	40	-1.62193	0.00831354	0.174044
						REACTOME_REGULATION_OF_LIPID_METABOLISM_BY_PPARALPHA	117	-1.61741	0.000531	0.177228
						REACTOME_UNFOLDED_PROTEIN_RESPONSE_UPR	89	-1.61392	0.00130344	0.179015
						REACTOME_CELL_CELL_COMMUNICATION	128	-1.6105	0.00165517	0.180779
						REACTOME_EXTRACELLULAR_MATRIX_ORGANIZATION	291	-1.60964	0	0.178829
						REACTOME_L1CAM_INTERACTIONS	115	-1.60748	0.000792	0.178763
						REACTOME_MET_PROMOTES_CELL_MOTILITY	41	-1.60541	0.00920097	0.178491
						BIOCARTA_NKT_PATHWAY	25	-1.60467	0.0185142	0.176367
						KEGG_FOCAL_ADHESION	195	-1.60459	0.000854	0.173426
						REACTOME_GAP_JUNCTION_TRAFFICKING_AND_REGULATION	44	-1.60227	0.0104725	0.173864
						KEGG_STARCH_AND_SUCROSE_METABOLISM	38	-1.59325	0.0134181	0.183904
						REACTOME_METABOLISM_OF_FAT_SOLUBLE_VITAMINS	46	-1.58575	0.0109262	0.191998

## Sheet: LAA_SedKO_SwimKO
Differentially regulated pathways in 2 days of swim exercise
Enriched in SedKO						Enriched in SwimKO
NAME	SIZE	NES	NOM p-val	FDR q-val		NAME	SIZE	NES	NOM p-val	FDR q-val
REACTOME_DNA_STRAND_ELONGATION	31	2.03175	0	0.010048		REACTOME_SMOOTH_MUSCLE_CONTRACTION	36	-2.00954	0	0.102875
KEGG_DNA_REPLICATION	34	2.00859	0	0.00810438		REACTOME_THE_CANONICAL_RETINOID_CYCLE_IN_RODS_TWILIGHT_VISION	23	-1.94567	0.000525	0.125799
REACTOME_POLYMERASE_SWITCHING_ON_THE_C_STRAND_OF_THE_TELOMERE	17	1.95137	0	0.0175644
KEGG_MISMATCH_REPAIR	21	1.89156	0.000323782	0.0373692
REACTOME_ACTIVATION_OF_ATR_IN_RESPONSE_TO_REPLICATION_STRESS	37	1.86112	0.000314367	0.0508037
BIOCARTA_MCM_PATHWAY	18	1.85829	0.00114379	0.0444967
REACTOME_DNA_REPLICATION	125	1.82879	0	0.0609726
REACTOME_ACTIVATION_OF_THE_PRE_REPLICATIVE_COMPLEX	32	1.81943	0.00126783	0.0615126
REACTOME_NOREPINEPHRINE_NEUROTRANSMITTER_RELEASE_CYCLE	17	1.80793	0.00145584	0.0648853
REACTOME_RESOLUTION_OF_AP_SITES_VIA_THE_MULTIPLE_NUCLEOTIDE_PATCH_REPLACEMENT_PATHWAY	24	1.80759	0.00048844	0.0586155
REACTOME_PCNA_DEPENDENT_LONG_PATCH_BASE_EXCISION_REPAIR	20	1.78081	0.0016292	0.0792817
BIOCARTA_EPO_PATHWAY	19	1.77433	0.00265208	0.079747
KEGG_NUCLEOTIDE_EXCISION_REPAIR	41	1.77343	0.000780762	0.0745098
PID_BARD1_PATHWAY	28	1.7669	0.00224791	0.0759646
REACTOME_DNA_REPLICATION_PRE_INITIATION	84	1.75934	0	0.0793737
PID_FOXM1_PATHWAY	40	1.75465	0.0010878	0.0793485
REACTOME_EXTENSION_OF_TELOMERES	43	1.72877	0.00202209	0.105479
REACTOME_DUAL_INCISION_IN_GG_NER	40	1.72722	0.001875	0.101798
REACTOME_S_PHASE	160	1.71637	0	0.110665
REACTOME_SWITCHING_OF_ORIGINS_TO_A_POST_REPLICATIVE_STATE	90	1.71286	0.000288018	0.10972
KEGG_GRAFT_VERSUS_HOST_DISEASE	26	1.71079	0.00338437	0.107466
REACTOME_TELOMERE_C_STRAND_LAGGING_STRAND_SYNTHESIS	27	1.6951	0.00401091	0.124958
REACTOME_RECOGNITION_OF_DNA_DAMAGE_BY_PCNA_CONTAINING_REPLICATION_COMPLEX	30	1.68905	0.00351438	0.128684
REACTOME_ACETYLCHOLINE_NEUROTRANSMITTER_RELEASE_CYCLE	16	1.68813	0.00613904	0.1247
REACTOME_ORC1_REMOVAL_FROM_CHROMATIN	71	1.68768	0.000600871	0.120364
PID_ATR_PATHWAY	39	1.68017	0.003567	0.12647
REACTOME_TAK1_ACTIVATES_NFKB_BY_PHOSPHORYLATION_AND_ACTIVATION_OF_IKKS_COMPLEX	30	1.67835	0.00494024	0.12453
REACTOME_GAP_FILLING_DNA_REPAIR_SYNTHESIS_AND_LIGATION_IN_GG_NER	24	1.67799	0.00780615	0.120628
REACTOME_LAGGING_STRAND_SYNTHESIS	19	1.67585	0.00715832	0.119586
REACTOME_APC_C_MEDIATED_DEGRADATION_OF_CELL_CYCLE_PROTEINS	86	1.66535	0.000724323	0.130797
KEGG_ASTHMA	23	1.66287	0.00875345	0.130301
KEGG_CELL_CYCLE	123	1.6566	0.000139043	0.1358
REACTOME_MITOTIC_G1_PHASE_AND_G1_S_TRANSITION	147	1.65114	0.000278746	0.140021
REACTOME_SEROTONIN_NEUROTRANSMITTER_RELEASE_CYCLE	17	1.64452	0.00923178	0.146503
KEGG_ANTIGEN_PROCESSING_AND_PRESENTATION	52	1.6441	0.00279547	0.142929
REACTOME_RESOLUTION_OF_ABASIC_SITES_AP_SITES	37	1.6384	0.00535096	0.148222
REACTOME_NUCLEOTIDE_EXCISION_REPAIR	107	1.63576	0.00070922	0.148577
REACTOME_ASSEMBLY_OF_THE_PRE_REPLICATIVE_COMPLEX	68	1.63222	0.00163277	0.150483
REACTOME_TP53_REGULATES_TRANSCRIPTION_OF_ADDITIONAL_CELL_CYCLE_GENES_WHOSE_EXACT_ROLE_IN_THE_P53_PATHWAY_REMAIN_UNCERTAIN	21	1.62244	0.0110121	0.163184
REACTOME_GLOBAL_GENOME_NUCLEOTIDE_EXCISION_REPAIR_GG_NER	82	1.61553	0.00103612	0.171715
KEGG_INTESTINAL_IMMUNE_NETWORK_FOR_IGA_PRODUCTION	40	1.61012	0.00780031	0.177553
REACTOME_TOLL_LIKE_RECEPTOR_10_TLR10_CASCADE	81	1.60665	0.00369222	0.179748
REACTOME_TRANSLESION_SYNTHESIS_BY_Y_FAMILY_DNA_POLYMERASES_BYPASSES_LESIONS_ON_DNA_TEMPLATE	39	1.60506	0.00966184	0.178667
PID_DNA_PK_PATHWAY	15	1.60464	0.0156019	0.175368
REACTOME_TP53_REGULATES_TRANSCRIPTION_OF_DNA_REPAIR_GENES	59	1.60405	0.00379939	0.172467
REACTOME_G1_S_SPECIFIC_TRANSCRIPTION	29	1.60175	0.0118135	0.172876
KEGG_METABOLISM_OF_XENOBIOTICS_BY_CYTOCHROME_P450	49	1.59403	0.00759417	0.183474
REACTOME_SYNTHESIS_OF_PC	28	1.5938	0.0137314	0.180081
REACTOME_TERMINATION_OF_TRANSLESION_DNA_SYNTHESIS	32	1.5933	0.0123028	0.177288
KEGG_ALLOGRAFT_REJECTION	27	1.59327	0.0130844	0.17379
REACTOME_TRANSLESION_SYNTHESIS_BY_POLH	19	1.59289	0.0150204	0.171115
REACTOME_TRANSCRIPTION_COUPLED_NUCLEOTIDE_EXCISION_REPAIR_TC_NER	75	1.58934	0.00416233	0.174135
REACTOME_CHROMOSOME_MAINTENANCE	95	1.58566	0.00337046	0.177445
BIOCARTA_IL2_PATHWAY	22	1.5787	0.0180049	0.186866
KEGG_AUTOIMMUNE_THYROID_DISEASE	31	1.5748	0.0147455	0.190737
REACTOME_HDR_THROUGH_HOMOLOGOUS_RECOMBINATION_HRR	66	1.57423	0.00630252	0.188357
REACTOME_DUAL_INCISION_IN_TC_NER	63	1.57389	0.006576	0.185681
REACTOME_METABOLISM_OF_FOLATE_AND_PTERINES	15	1.56949	0.0189863	0.190738
REACTOME_DOPAMINE_NEUROTRANSMITTER_RELEASE_CYCLE	22	1.56718	0.0197242	0.191785

## Sheet: LV_SedWT_SwimWT
Differentially regulated pathways in 2 days of swim exercise
Enriched in SedWT						Enriched in SwimWT
NAME	SIZE	NES	NOM p-val	FDR q-val		NAME	SIZE	NES	NOM p-val	FDR q-val
KEGG_ALLOGRAFT_REJECTION	27	1.86267	0.000137118	0.0948988		REACTOME_ANTIMICROBIAL_PEPTIDES	69	-2.2569	0	0.00393126
KEGG_GRAFT_VERSUS_HOST_DISEASE	26	1.84398	0.000136649	0.0693401
PID_FOXM1_PATHWAY	40	1.83192	0.000266028	0.0590773
KEGG_AUTOIMMUNE_THYROID_DISEASE	31	1.79143	0.000676682	0.0932632
REACTOME_ACTIVATION_OF_ATR_IN_RESPONSE_TO_REPLICATION_STRESS	37	1.78043	0	0.0902281
REACTOME_DNA_STRAND_ELONGATION	31	1.77939	0.000807646	0.0764369
KEGG_DNA_REPLICATION	34	1.73987	0.00106242	0.127115
REACTOME_DNA_REPLICATION	125	1.73474	0	0.120874
KEGG_CELL_CYCLE	123	1.71209	0	0.153273
BIOCARTA_MCM_PATHWAY	18	1.70279	0.00396601	0.158358
REACTOME_ACTIVATION_OF_THE_PRE_REPLICATIVE_COMPLEX	32	1.69916	0.00161377	0.151898
BIOCARTA_41BB_PATHWAY	17	1.6926	0.00254381	0.153777
KEGG_TYPE_I_DIABETES_MELLITUS	33	1.69162	0.00281501	0.143794
PID_FOXO_PATHWAY	49	1.68079	0.00142064	0.155678
REACTOME_POLYMERASE_SWITCHING_ON_THE_C_STRAND_OF_THE_TELOMERE	17	1.65031	0.00511582	0.196197
							69	-2.2569	0	0.00393126

## Sheet: LV_SedKO_SwimKO
Differentially regulated pathways in 2 days of swim exercise
Enriched in SedKO						Enriched in SwimKO
NAME	SIZE	NES	NOM p-val	FDR q-val		NAME	SIZE	NES	NOM p-val	FDR q-val
REACTOME_RESOLUTION_OF_SISTER_CHROMATID_COHESION	119	2.31066	0	0
KEGG_RIBOSOME	83	2.30754	0	0
PID_FOXM1_PATHWAY	40	2.30541	0	0
REACTOME_SRP_DEPENDENT_COTRANSLATIONAL_PROTEIN_TARGETING_TO_MEMBRANE	108	2.29829	0	0
REACTOME_EUKARYOTIC_TRANSLATION_ELONGATION	89	2.25618	0	0
REACTOME_RHO_GTPASES_ACTIVATE_FORMINS	133	2.25356	0	0
REACTOME_RESPONSE_OF_EIF2AK4_GCN2_TO_AMINO_ACID_DEFICIENCY	96	2.24309	0	1.71356e-05
REACTOME_RRNA_PROCESSING	197	2.23903	0	1.49936e-05
KEGG_DNA_REPLICATION	34	2.23552	0	1.33276e-05
KEGG_CELL_CYCLE	123	2.20135	0	4.66158e-05
PID_PLK1_PATHWAY	46	2.18607	0	5.31994e-05
REACTOME_MITOTIC_PROMETAPHASE	195	2.14975	0	7.80812e-05
REACTOME_MITOTIC_SPINDLE_CHECKPOINT	107	2.14596	0	7.20749e-05
REACTOME_ACTIVATION_OF_ATR_IN_RESPONSE_TO_REPLICATION_STRESS	37	2.14347	0	6.69267e-05
REACTOME_DNA_REPLICATION	125	2.13075	0	7.01189e-05
REACTOME_EUKARYOTIC_TRANSLATION_INITIATION	114	2.12473	0	7.99749e-05
REACTOME_NONSENSE_MEDIATED_DECAY_NMD	111	2.10786	0	0.000169955
REACTOME_SEPARATION_OF_SISTER_CHROMATIDS	183	2.10769	0	0.000160513
PID_AURORA_A_PATHWAY	31	2.10532	0	0.000152065
KEGG_VIRAL_MYOCARDITIS	60	2.09979	0	0.000173296
REACTOME_CELL_CYCLE_CHECKPOINTS	272	2.09786	0	0.000181733
REACTOME_REGULATION_OF_EXPRESSION_OF_SLITS_AND_ROBOS	167	2.08958	0	0.000215162
REACTOME_DNA_STRAND_ELONGATION	31	2.08893	0	0.000205807
REACTOME_ACTIVATION_OF_THE_PRE_REPLICATIVE_COMPLEX	32	2.06356	0	0.000369179
KEGG_ASTHMA	23	2.04806	0	0.000525069
REACTOME_DNA_REPLICATION_PRE_INITIATION	84	2.04274	0	0.000561816
PID_AURORA_B_PATHWAY	38	2.02496	0	0.000827534
KEGG_LEISHMANIA_INFECTION	61	2.02465	0	0.000797979
REACTOME_MITOTIC_METAPHASE_AND_ANAPHASE	226	2.01978	0	0.000864748
REACTOME_MITOTIC_G1_PHASE_AND_G1_S_TRANSITION	147	2.01457	0	0.000939028
REACTOME_INFLUENZA_INFECTION	147	1.98994	0	0.00156308
BIOCARTA_MCM_PATHWAY	18	1.98895	0.000570993	0.00155035
REACTOME_G2_M_CHECKPOINTS	152	1.98135	0	0.00176533
REACTOME_EXTENSION_OF_TELOMERES	43	1.95937	0	0.0025434
REACTOME_KINESINS	55	1.95915	0	0.00248062
KEGG_AUTOIMMUNE_THYROID_DISEASE	31	1.95622	0.000375094	0.00255596
KEGG_INTESTINAL_IMMUNE_NETWORK_FOR_IGA_PRODUCTION	40	1.95465	0	0.00254901
PID_ATR_PATHWAY	39	1.93994	0.00037037	0.0032438
REACTOME_SWITCHING_OF_ORIGINS_TO_A_POST_REPLICATIVE_STATE	90	1.93875	0	0.0032053
REACTOME_S_PHASE	160	1.9372	0	0.00321736
REACTOME_RRNA_MODIFICATION_IN_THE_NUCLEUS_AND_CYTOSOL	59	1.93025	0	0.00354118
KEGG_ALLOGRAFT_REJECTION	27	1.92451	0.000184911	0.00373947
KEGG_ANTIGEN_PROCESSING_AND_PRESENTATION	52	1.91602	0	0.0041736
REACTOME_ORC1_REMOVAL_FROM_CHROMATIN	71	1.91028	0.000180408	0.00449784
REACTOME_SIGNALING_BY_ROBO_RECEPTORS	210	1.91	0	0.00442884
PID_E2F_PATHWAY	73	1.89558	0.000181686	0.00557612
REACTOME_RHO_GTPASES_ACTIVATE_IQGAPS	28	1.89415	0.000380662	0.00557514
REACTOME_APC_C_MEDIATED_DEGRADATION_OF_CELL_CYCLE_PROTEINS	86	1.88851	0	0.00593734
REACTOME_CHROMOSOME_MAINTENANCE	95	1.88745	0	0.0059031
KEGG_PATHOGENIC_ESCHERICHIA_COLI_INFECTION	53	1.88723	0.000181951	0.00579873
REACTOME_PHOSPHORYLATION_OF_THE_APC_C	19	1.88324	0.000374392	0.00604455
REACTOME_POLYMERASE_SWITCHING_ON_THE_C_STRAND_OF_THE_TELOMERE	17	1.8813	0.000561062	0.00610758
KEGG_P53_SIGNALING_PATHWAY	65	1.868	0	0.00742126
REACTOME_ECM_PROTEOGLYCANS	76	1.8632	0	0.00782406
KEGG_GRAFT_VERSUS_HOST_DISEASE	26	1.84539	0.000950751	0.0101287
REACTOME_G1_S_SPECIFIC_TRANSCRIPTION	29	1.84044	0.00110579	0.0107538
REACTOME_CYCLIN_A_B1_B2_ASSOCIATED_EVENTS_DURING_G2_M_TRANSITION	24	1.83215	0.00224215	0.0118161
REACTOME_ASSEMBLY_OF_THE_PRE_REPLICATIVE_COMPLEX	68	1.83059	0.000353857	0.0118885
BIOCARTA_EFP_PATHWAY	15	1.82883	0.0013235	0.0119865
REACTOME_TRANSPORT_OF_CONNEXONS_TO_THE_PLASMA_MEMBRANE	17	1.82728	0.00209165	0.0120153
REACTOME_TELOMERE_C_STRAND_LAGGING_STRAND_SYNTHESIS	27	1.82499	0.00247054	0.0122217
REACTOME_LAGGING_STRAND_SYNTHESIS	19	1.81939	0.00129534	0.0130591
REACTOME_ACTIVATION_OF_THE_MRNA_UPON_BINDING_OF_THE_CAP_BINDING_COMPLEX_AND_EIFS_AND_SUBSEQUENT_BINDING_TO_43S	57	1.81729	0.000178476	0.0132413
REACTOME_M_PHASE	380	1.81219	0	0.0140125
REACTOME_RHO_GTPASE_EFFECTORS	290	1.81215	0	0.0137987
REACTOME_PCNA_DEPENDENT_LONG_PATCH_BASE_EXCISION_REPAIR	20	1.81103	0.000373134	0.0137712
REACTOME_RESOLUTION_OF_AP_SITES_VIA_THE_MULTIPLE_NUCLEOTIDE_PATCH_REPLACEMENT_PATHWAY	24	1.80739	0.0018546	0.0142998
REACTOME_HDR_THROUGH_HOMOLOGOUS_RECOMBINATION_HRR	66	1.80551	0.000179051	0.0144299
REACTOME_COOPERATION_OF_PREFOLDIN_AND_TRIC_CCT_IN_ACTIN_AND_TUBULIN_FOLDING	30	1.80113	0.0015015	0.0151102
REACTOME_GAP_JUNCTION_TRAFFICKING_AND_REGULATION	44	1.79239	0.000552894	0.0166999
REACTOME_SELENOAMINO_ACID_METABOLISM	112	1.79203	0	0.0165554
REACTOME_REGULATION_OF_TP53_ACTIVITY_THROUGH_PHOSPHORYLATION	91	1.77695	0	0.0198109
REACTOME_HOMOLOGOUS_DNA_PAIRING_AND_STRAND_EXCHANGE	42	1.77425	0.000911411	0.0202319
REACTOME_MHC_CLASS_II_ANTIGEN_PRESENTATION	112	1.76271	0.000177054	0.0230775
KEGG_CELL_ADHESION_MOLECULES_CAMS	119	1.75283	0.000345363	0.025742
REACTOME_TRANSLATION	287	1.75228	0	0.0255871
REACTOME_COLLAGEN_BIOSYNTHESIS_AND_MODIFYING_ENZYMES	66	1.75084	0.00182315	0.0257203
REACTOME_ACTIVATION_OF_AMPK_DOWNSTREAM_OF_NMDARS	25	1.74816	0.00260611	0.0262717
REACTOME_THE_ROLE_OF_GTSE1_IN_G2_M_PROGRESSION_AFTER_G2_CHECKPOINT	75	1.74401	0.000537634	0.0274125
REACTOME_POLO_LIKE_KINASE_MEDIATED_EVENTS	16	1.74397	0.00344762	0.0270815
REACTOME_G0_AND_EARLY_G1	27	1.73623	0.00393922	0.029305
REACTOME_HSP90_CHAPERONE_CYCLE_FOR_STEROID_HORMONE_RECEPTORS_SHR	52	1.73438	0.00127644	0.0296162
REACTOME_TERMINATION_OF_TRANSLESION_DNA_SYNTHESIS	32	1.72209	0.00272084	0.0339641
REACTOME_TELOMERE_MAINTENANCE	69	1.72205	0.00143446	0.0335707
REACTOME_FORMATION_OF_TUBULIN_FOLDING_INTERMEDIATES_BY_CCT_TRIC	23	1.7079	0.00645406	0.0389681
PID_BARD1_PATHWAY	28	1.6823	0.00532697	0.0513266
BIOCARTA_MPR_PATHWAY	20	1.67733	0.00837054	0.0534885
REACTOME_HOMOLOGY_DIRECTED_REPAIR	121	1.67732	0	0.0528911
REACTOME_GAP_FILLING_DNA_REPAIR_SYNTHESIS_AND_LIGATION_IN_GG_NER	24	1.67375	0.00932488	0.0544246
REACTOME_G2_M_DNA_DAMAGE_CHECKPOINT	79	1.67179	0.000528262	0.054928
PID_INTEGRIN1_PATHWAY	66	1.66889	0.00175316	0.0559831
REACTOME_INTERCONVERSION_OF_NUCLEOTIDE_DI_AND_TRIPHOSPHATES	28	1.66858	0.00724234	0.0555621
REACTOME_INITIATION_OF_NUCLEAR_ENVELOPE_NE_REFORMATION	19	1.66715	0.00850179	0.0558155
PID_ATF2_PATHWAY	58	1.66443	0.00341481	0.0568498
REACTOME_POST_CHAPERONIN_TUBULIN_FOLDING_PATHWAY	21	1.66326	0.0118377	0.0569316
REACTOME_GAP_JUNCTION_ASSEMBLY	32	1.66111	0.00630096	0.0575995
REACTOME_COPI_DEPENDENT_GOLGI_TO_ER_RETROGRADE_TRAFFIC	93	1.66074	0.00105208	0.0572322
BIOCARTA_CHEMICAL_PATHWAY	18	1.65905	0.0104948	0.0576421
BIOCARTA_G2_PATHWAY	24	1.64878	0.00925052	0.0634598
REACTOME_MITOTIC_G2_G2_M_PHASES	192	1.64847	0	0.0630445
REACTOME_APC_C_CDH1_MEDIATED_DEGRADATION_OF_CDC20_AND_OTHER_APC_C_CDH1_TARGETED_PROTEINS_IN_LATE_MITOSIS_EARLY_G1	72	1.64793	0.00281839	0.0627937
REACTOME_TRANSCRIPTIONAL_REGULATION_BY_VENTX	36	1.64479	0.00949014	0.0641295
REACTOME_TP53_REGULATES_TRANSCRIPTION_OF_ADDITIONAL_CELL_CYCLE_GENES_WHOSE_EXACT_ROLE_IN_THE_P53_PATHWAY_REMAIN_UNCERTAIN	21	1.64093	0.0126415	0.0660504
REACTOME_PLATELET_ADHESION_TO_EXPOSED_COLLAGEN	15	1.63973	0.0147114	0.0662021
REACTOME_MRNA_SPLICING_MINOR_PATHWAY	52	1.63868	0.00597177	0.0662264
REACTOME_TRANSLOCATION_OF_SLC2A4_GLUT4_TO_THE_PLASMA_MEMBRANE	68	1.63796	0.00374398	0.066084
REACTOME_RECOGNITION_OF_DNA_DAMAGE_BY_PCNA_CONTAINING_REPLICATION_COMPLEX	30	1.63279	0.00745295	0.0688708
BIOCARTA_INFLAM_PATHWAY	24	1.63	0.0129286	0.0702022
REACTOME_INTERFERON_ALPHA_BETA_SIGNALING	51	1.62958	0.00420398	0.0698577
REACTOME_APC_C_CDC20_MEDIATED_DEGRADATION_OF_CYCLIN_B	23	1.62865	0.0118155	0.0698607
REACTOME_TP53_REGULATES_TRANSCRIPTION_OF_DNA_REPAIR_GENES	59	1.6258	0.00589812	0.0713016
NABA_COLLAGENS	43	1.62197	0.00741427	0.0733514
REACTOME_SIGNALING_BY_RHO_GTPASES	417	1.61982	0	0.0742449
REACTOME_COLLAGEN_CHAIN_TRIMERIZATION	43	1.61411	0.00718364	0.0778153
REACTOME_RNA_POLYMERASE_I_TRANSCRIPTION_TERMINATION	29	1.61162	0.0123026	0.0790442
KEGG_SYSTEMIC_LUPUS_ERYTHEMATOSUS	90	1.60785	0.00297099	0.0811934
KEGG_MISMATCH_REPAIR	21	1.60174	0.01729	0.0853309
REACTOME_APC_CDC20_MEDIATED_DEGRADATION_OF_NEK2A	25	1.60062	0.0157407	0.0855271
KEGG_PYRIMIDINE_METABOLISM	94	1.59904	0.00297099	0.0860827
KEGG_SPLICEOSOME	120	1.59558	0.00138265	0.0882054
REACTOME_TRANSLESION_SYNTHESIS_BY_Y_FAMILY_DNA_POLYMERASES_BYPASSES_LESIONS_ON_DNA_TEMPLATE	39	1.59146	0.0120348	0.0909712
REACTOME_FORMATION_OF_THE_EARLY_ELONGATION_COMPLEX	31	1.59024	0.0139963	0.0913499
REACTOME_INHIBITION_OF_THE_PROTEOLYTIC_ACTIVITY_OF_APC_C_REQUIRED_FOR_THE_ONSET_OF_ANAPHASE_BY_MITOTIC_SPINDLE_CHECKPOINT_COMPONENTS	20	1.58843	0.0179009	0.0920667
REACTOME_STRIATED_MUSCLE_CONTRACTION	36	1.58322	0.0135805	0.0957825
REACTOME_DNA_DOUBLE_STRAND_BREAK_REPAIR	148	1.58278	0.00120461	0.0954035
REACTOME_INITIAL_TRIGGERING_OF_COMPLEMENT	19	1.57848	0.0199963	0.0982792
REACTOME_SEALING_OF_THE_NUCLEAR_ENVELOPE_NE_BY_ESCRT_III	26	1.57845	0.0159385	0.0975333
BIOCARTA_ATRBRCA_PATHWAY	21	1.57698	0.0241098	0.0980646
REACTOME_PROCESSING_OF_DNA_DOUBLE_STRAND_BREAK_ENDS	82	1.57408	0.00587502	0.0999613
REACTOME_COLLAGEN_FORMATION	89	1.57394	0.00482675	0.0993143
REACTOME_KSRP_KHSRP_BINDS_AND_DESTABILIZES_MRNA	17	1.57171	0.023334	0.100541
REACTOME_TNFR2_NON_CANONICAL_NF_KB_PATHWAY	98	1.57095	0.00263343	0.100437
REACTOME_AGGREPHAGY	40	1.56632	0.0160044	0.104053
REACTOME_HDR_THROUGH_SINGLE_STRAND_ANNEALING_SSA	37	1.56582	0.0169522	0.10375
REACTOME_RECYCLING_PATHWAY_OF_L1	44	1.56496	0.0148026	0.103741
REACTOME_PHASE_2_PLATEAU_PHASE	24	1.56465	0.0232256	0.103243
REACTOME_FORMATION_OF_FIBRIN_CLOT_CLOTTING_CASCADE	38	1.56321	0.0160679	0.103858
REACTOME_RECRUITMENT_OF_NUMA_TO_MITOTIC_CENTROSOMES	89	1.55489	0.00517026	0.110842
PID_AMB2_NEUTROPHILS_PATHWAY	40	1.55411	0.0168684	0.11077
REACTOME_DNA_DAMAGE_BYPASS	48	1.5499	0.0160701	0.114172
KEGG_RNA_POLYMERASE	27	1.54755	0.0209405	0.115738
KEGG_COMPLEMENT_AND_COAGULATION_CASCADES	65	1.54701	0.00855005	0.115459
REACTOME_BINDING_AND_UPTAKE_OF_LIGANDS_BY_SCAVENGER_RECEPTORS	39	1.54603	0.0195716	0.115614
REACTOME_IMMUNOREGULATORY_INTERACTIONS_BETWEEN_A_LYMPHOID_AND_A_NON_LYMPHOID_CELL	97	1.54558	0.00488656	0.115259
REACTOME_E2F_MEDIATED_REGULATION_OF_DNA_REPLICATION	21	1.54535	0.0278661	0.114691
REACTOME_TELOMERE_EXTENSION_BY_TELOMERASE	16	1.54208	0.0280197	0.117221
REACTOME_MRNA_CAPPING	28	1.53785	0.0261097	0.120754
PID_P73PATHWAY	76	1.53351	0.0100358	0.124564
REACTOME_OTHER_SEMAPHORIN_INTERACTIONS	19	1.53277	0.0317908	0.124459
BIOCARTA_P53_PATHWAY	16	1.53257	0.0365763	0.123833
REACTOME_CROSS_PRESENTATION_OF_SOLUBLE_EXOGENOUS_ANTIGENS_ENDOSOMES	49	1.53112	0.0150156	0.124562
REACTOME_NUCLEAR_ENVELOPE_NE_REASSEMBLY	70	1.52681	0.0105559	0.128235
PID_FANCONI_PATHWAY	45	1.52162	0.0213962	0.133112
REACTOME_RNA_POLYMERASE_III_TRANSCRIPTION_TERMINATION	23	1.51818	0.0308802	0.135952
REACTOME_INTERFERON_GAMMA_SIGNALING	74	1.51715	0.0122302	0.136183
REACTOME_ANTIGEN_PROCESSING_CROSS_PRESENTATION	95	1.51638	0.00827756	0.136155
REACTOME_REGULATION_OF_KIT_SIGNALING	16	1.51489	0.0381507	0.136955
REACTOME_HIV_TRANSCRIPTION_ELONGATION	40	1.51484	0.019749	0.136143
KEGG_PANCREATIC_CANCER	70	1.51201	0.0104036	0.1385
REACTOME_DUAL_INCISION_IN_TC_NER	63	1.51075	0.0158273	0.139083
REACTOME_REGULATION_OF_RUNX3_EXPRESSION_AND_ACTIVITY	55	1.50457	0.0169065	0.145173
REACTOME_AURKA_ACTIVATION_BY_TPX2	71	1.50429	0.0157368	0.144606
REACTOME_THE_CANONICAL_RETINOID_CYCLE_IN_RODS_TWILIGHT_VISION	23	1.5031	0.038367	0.145115
REACTOME_SCAVENGING_BY_CLASS_A_RECEPTORS	19	1.50306	0.0438284	0.144269
REACTOME_TP53_REGULATES_TRANSCRIPTION_OF_CELL_CYCLE_GENES	49	1.49988	0.0212334	0.147168
REACTOME_FGFR2_MUTANT_RECEPTOR_ACTIVATION	33	1.49865	0.0292354	0.147728
REACTOME_INTERFERON_SIGNALING	164	1.49821	0.00134318	0.147355
KEGG_VIBRIO_CHOLERAE_INFECTION	52	1.49745	0.0184883	0.147386
KEGG_PRIMARY_IMMUNODEFICIENCY	35	1.49577	0.0295196	0.148548
NABA_CORE_MATRISOME	263	1.49546	0.00129095	0.148049
KEGG_CYTOSOLIC_DNA_SENSING_PATHWAY	43	1.49537	0.0266888	0.147282
BIOCARTA_COMP_PATHWAY	17	1.49505	0.0448934	0.146803
KEGG_HEMATOPOIETIC_CELL_LINEAGE	78	1.49273	0.0114163	0.148617
PID_MYC_ACTIV_PATHWAY	78	1.48963	0.0141769	0.151393
REACTOME_RNA_POLYMERASE_I_TRANSCRIPTION_INITIATION	45	1.48472	0.0279898	0.156392
REACTOME_EPHA_MEDIATED_GROWTH_CONE_COLLAPSE	28	1.48301	0.0373065	0.157585
REACTOME_GOLGI_TO_ER_RETROGRADE_TRANSPORT	127	1.48256	0.0059038	0.157264
REACTOME_ANTIGEN_PRESENTATION_FOLDING_ASSEMBLY_AND_PEPTIDE_LOADING_OF_CLASS_I_MHC	21	1.48242	0.0479985	0.156554
PID_CONE_PATHWAY	21	1.47905	0.0477759	0.159789
KEGG_TYPE_I_DIABETES_MELLITUS	33	1.47842	0.0354048	0.159635
REACTOME_NEGATIVE_REGULATION_OF_NOTCH4_SIGNALING	54	1.47779	0.0205382	0.159497
REACTOME_SUMOYLATION_OF_DNA_REPLICATION_PROTEINS	45	1.47712	0.0279299	0.159397
PID_DELTA_NP63_PATHWAY	47	1.47693	0.0249865	0.158776
REACTOME_HIV_TRANSCRIPTION_INITIATION	45	1.47403	0.0243992	0.161513
REACTOME_RESOLUTION_OF_ABASIC_SITES_AP_SITES	37	1.46958	0.0347032	0.166147
REACTOME_DNA_REPAIR	304	1.4694	0.00112576	0.165468
REACTOME_REGULATION_OF_TP53_ACTIVITY	158	1.46544	0.00562948	0.168648
KEGG_MAPK_SIGNALING_PATHWAY	260	1.46417	0.00129891	0.168484
REACTOME_ASSEMBLY_OF_COLLAGEN_FIBRILS_AND_OTHER_MULTIMERIC_STRUCTURES	61	1.46348	0.0209405	0.168506
REACTOME_TRANSCRIPTIONAL_REGULATION_BY_TP53	349	1.46289	0	0.168387
KEGG_OOCYTE_MEIOSIS	108	1.45849	0.014564	0.173118
REACTOME_ASSEMBLY_AND_CELL_SURFACE_PRESENTATION_OF_NMDA_RECEPTORS	40	1.45746	0.033038	0.173595
REACTOME_INTRAFLAGELLAR_TRANSPORT	54	1.45697	0.0307556	0.17249
REACTOME_REGULATION_OF_PLK1_ACTIVITY_AT_G2_M_TRANSITION	86	1.45535	0.0177525	0.173681
REACTOME_COMPLEMENT_CASCADE	48	1.44809	0.0332598	0.181398
REACTOME_SEMAPHORIN_INTERACTIONS	63	1.44761	0.0233413	0.181147
REACTOME_TRANSCRIPTION_COUPLED_NUCLEOTIDE_EXCISION_REPAIR_TC_NER	75	1.44546	0.02012	0.18309
PID_SYNDECAN_1_PATHWAY	46	1.44422	0.0342702	0.183811
REACTOME_METABOLISM_OF_POLYAMINES	59	1.44409	0.0331814	0.183067
REACTOME_FGFR2_ALTERNATIVE_SPLICING	27	1.44354	0.0489233	0.1829
REACTOME_GENE_AND_PROTEIN_EXPRESSION_BY_JAK_STAT_SIGNALING_AFTER_INTERLEUKIN_12_STIMULATION	35	1.44332	0.0434137	0.182295
PID_ATM_PATHWAY	34	1.44327	0.0444892	0.181479
REACTOME_NUCLEOTIDE_EXCISION_REPAIR	107	1.44292	0.011976	0.181069
REACTOME_EPH_EPHRIN_MEDIATED_REPULSION_OF_CELLS	50	1.43865	0.0337653	0.185043
KEGG_NUCLEOTIDE_EXCISION_REPAIR	41	1.43495	0.0454961	0.188235
REACTOME_INTEGRIN_CELL_SURFACE_INTERACTIONS	84	1.43481	0.0203028	0.187537
REACTOME_TRNA_MODIFICATION_IN_THE_NUCLEUS_AND_CYTOSOL	43	1.43329	0.0430205	0.188742
NABA_BASEMENT_MEMBRANES	39	1.42871	0.0457153	0.193265
PID_AP1_PATHWAY	69	1.42808	0.0283221	0.193259
KEGG_ECM_RECEPTOR_INTERACTION	83	1.42657	0.020964	0.193577
REACTOME_ACTIVATION_OF_NMDA_RECEPTORS_AND_POSTSYNAPTIC_EVENTS	88	1.42391	0.0179989	0.195381
